# Supplementary material for: Whole Genome Analyses of a Well-Differentiated Liposarcoma Reveals Novel SYT1 and DDR2 Rearrangements
Source: PLoS One. 2014 Feb 5;9(2):e87113. doi: 10.1371/journal.pone.0087113 (PMC3914808; doi:10.1371/journal.pone.0087113)
Supplement: Table S5 — Putative fusions identified from RNA sequencing fusion analysis. (XLSX) [file pone.0087113.s006.xlsx]

## Sheet: Table S5
Table S5. Putative fusions identified from RNA sequencing fusion analysis
Fusion genes	Gene1 hg19 location	Gene2 hg19 location
RGS5->ENSG00000258168 (LOC100507330, antisense RNA)	chr1:163276021-163276118	chr12:70864088-70913976
GLIPR1L1->ENSG00000231121 (processed transcript)	chr12:75737471-75737717	chr12:77718419-77718993
NR2C1->ENSG00000188596 (C12orf55)	chr12:95451327-95451418	chr12:96912704-96912848
HMGA2->PRKRIR	chr12:66232297-66232348	chr11:76076894-76077015
SCAPER->ENSG00000259485 (lncRNA)	chr15:76866497-76866624	chr1597839553-97954419
TSHZ3->KCNC2	chr19:31840084-31840189	chr12:75444168-75445096
OS9->GLIPR1L2	chr12:58089561-58089625	chr12:75785130-75804211
GPC5->SCAPER	chr13:92101013-92101175	chr15:76866497-76866624
TSFM->YEATS4	chr12:58186767-58186855	chr12:69759568-69759663
ENSG00000162946 (DISC 1) ->CPM	chr1:231954263-232094571	chr12:69326456-69326619
DNAJC24->ENSG00000258109 (lncRNA)	chr11:31392261-31392405	chr12:73711586-73864573
SYT1->ENSG00000188596 (C12orf63)	chr12:79371577-79371710	chr12:96927838-96928004
RPSAP52->ENSG00000188596 (C12orf63)	chr12:66152811-66220620	chr15:96912704-96912848
GLIPR1L2->ZDHHC17	chr12:75804212-75804458	chr12:77157852-77158108
TBC1D15->RPSAP52	chr12:72233591-72265847	chr12:66152811-66220620
ABLIM1->ENSG00000228484 (lncRNA)	chr10:116361584-116361719	chr10:116524751-116535698
